# Supplementary material for: Prognostic and clinicopathological significance of long noncoding RNA H19 overexpression in human solid tumors: evidence from a meta-analysis
Source: PubMed Central journal article supplement (PMC5347760; doi:10.18632/oncotarget.13076), 2016-11-04
Supplement: oncotarget-07-83177-s001.pdf [file oncotarget-07-83177-s001.pdf]

# Prognostic and clinicopathological significance of long noncoding RNA H19 overexpression in human solid tumors: evidence from a meta-analysis

## SUPPLEMENTARY FIGURES AND TABLES

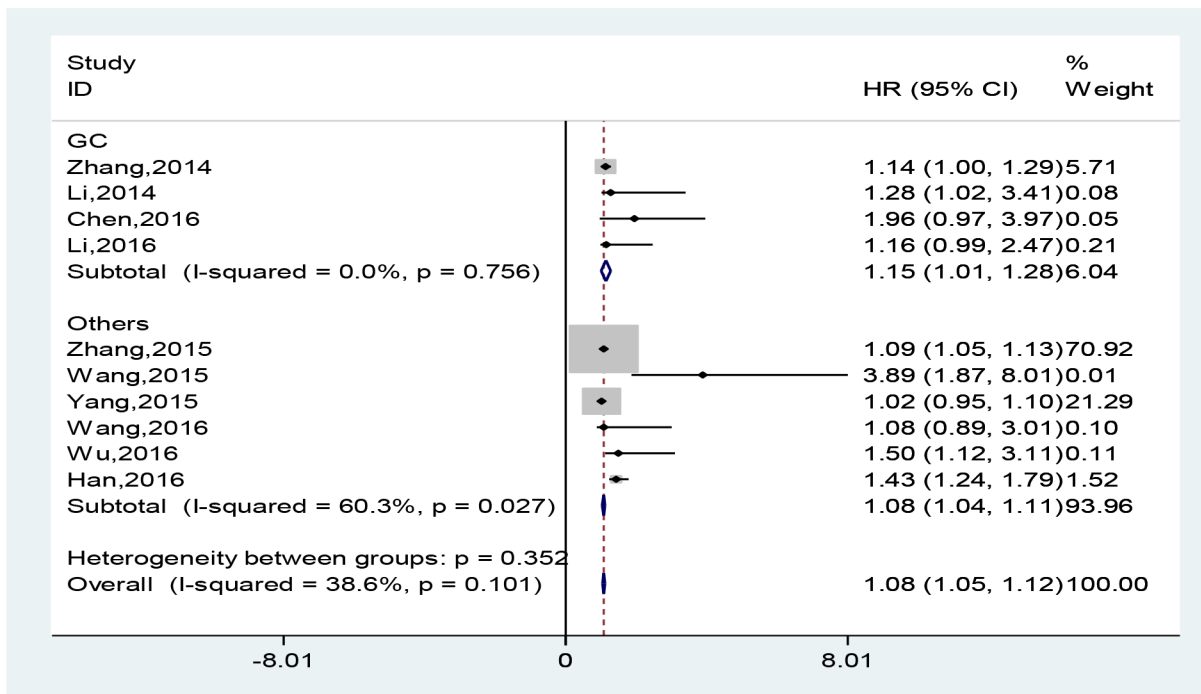

Supplementary Figure S1: Meta-analysis for the pooled HRs of OS stratified by the cancer type.

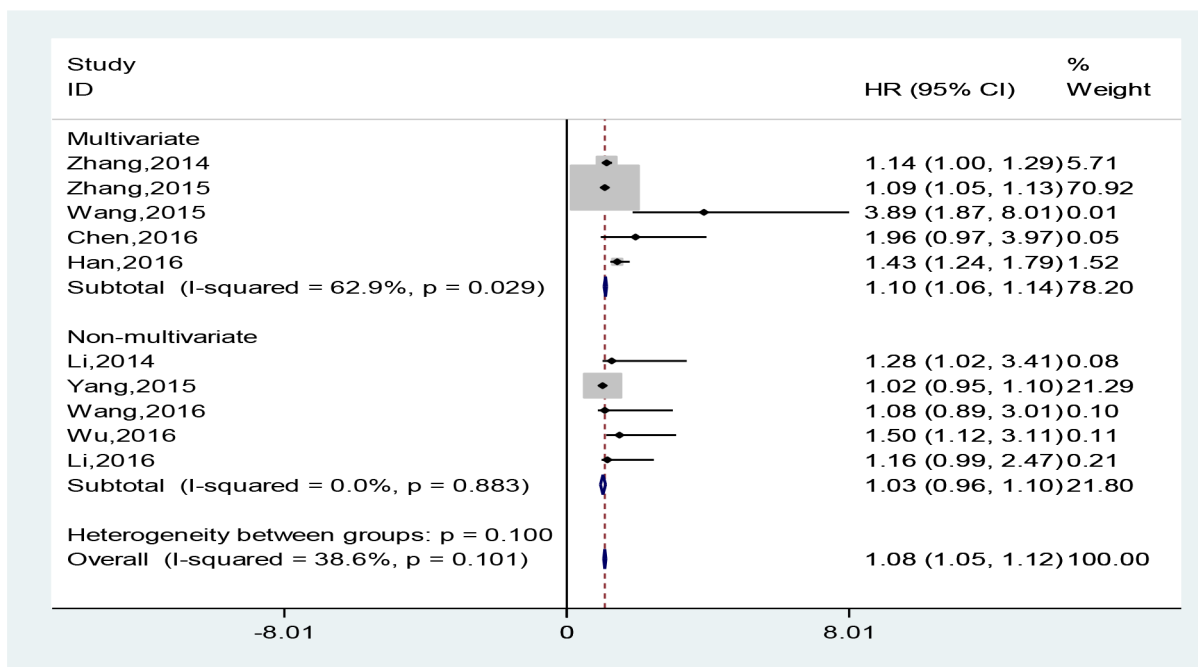

Supplementary Figure S2: Meta-analysis for the pooled HRs of OS stratified by the analysis type.

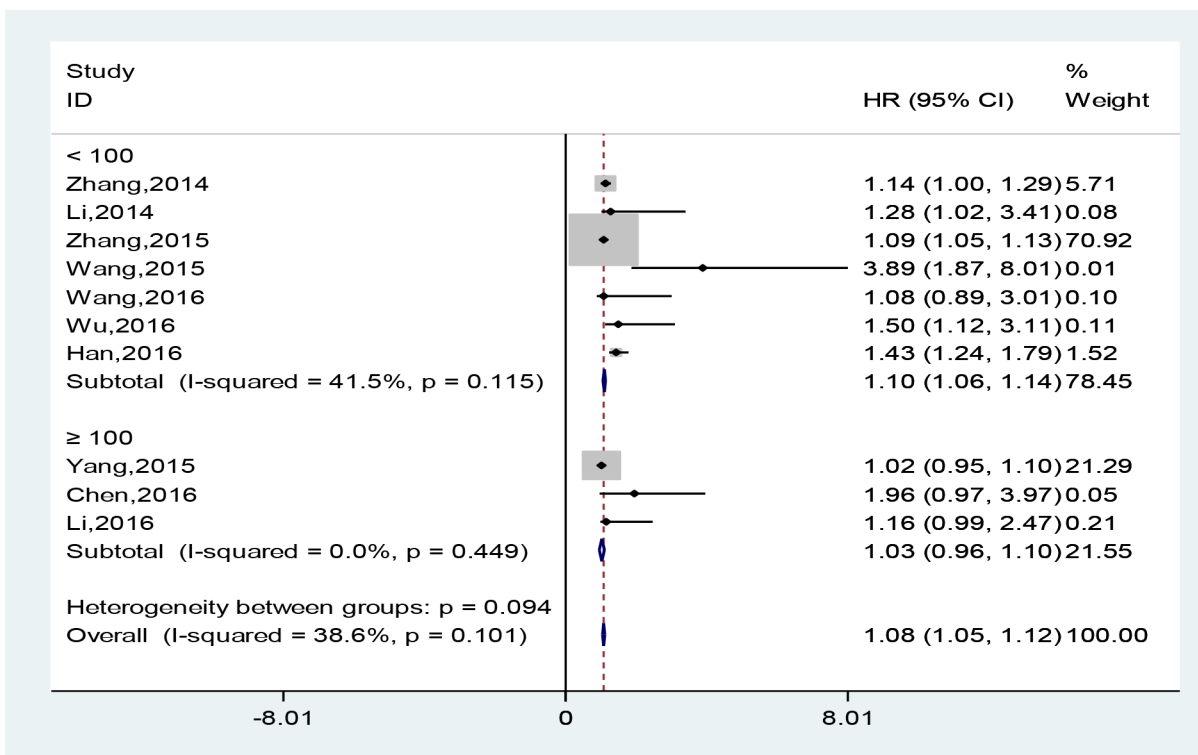

Supplementary Figure S3: Meta-analysis for the pooled HRs of OS stratified by the sample size.

(2) Association between lncRNA-H19 expression and clinicopathological parameters:

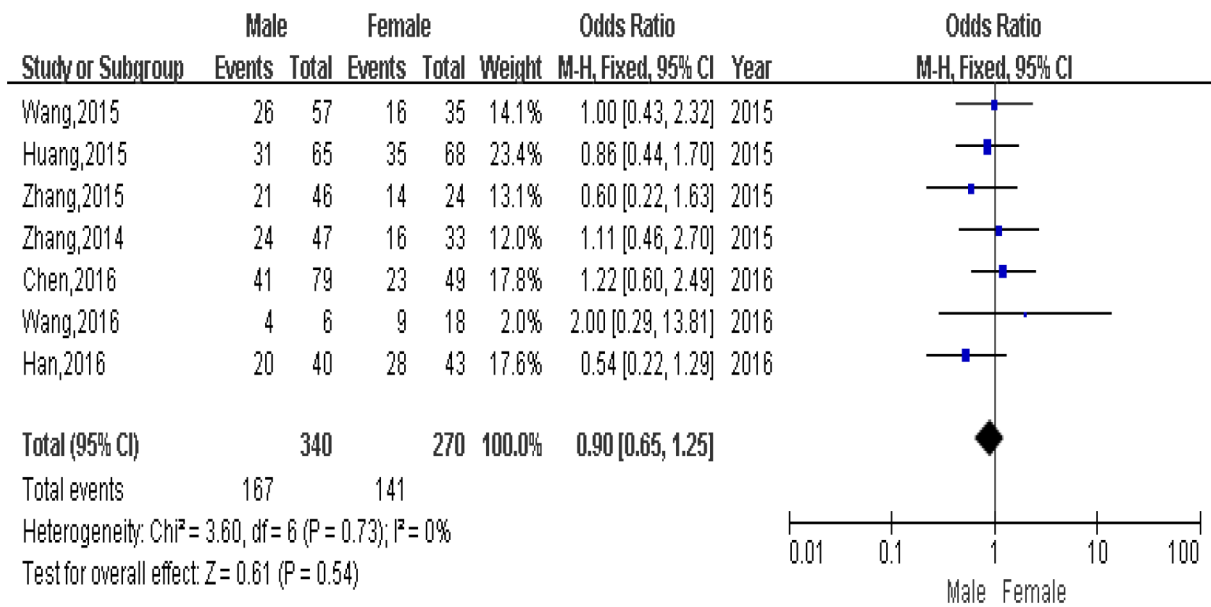

Supplementary Figure S4: The correlation between H19 expression and gender (male vs. female).

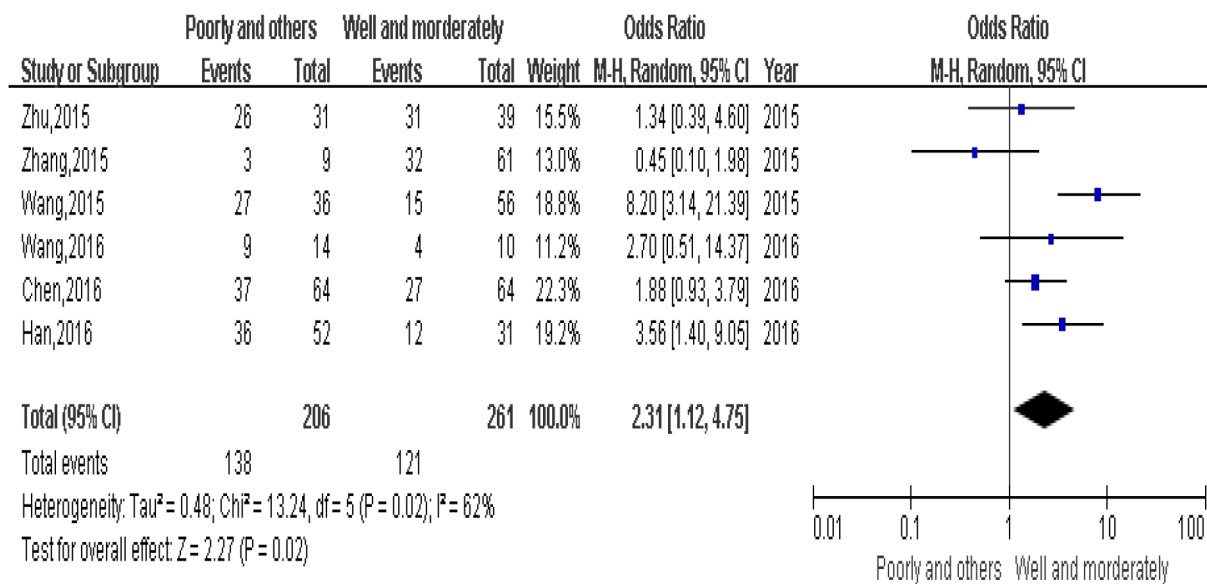

Supplementary Figure S5: The correlation between H19 expression and tumor differentiation (poorly/others vs. well/moderately).

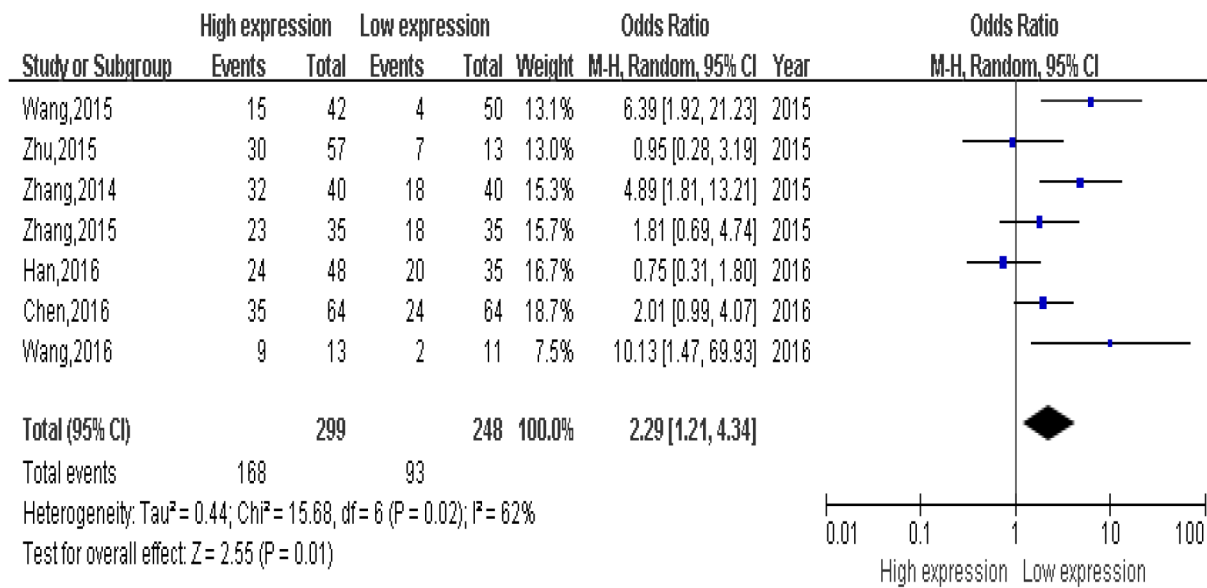

Supplementary Figure S6: The correlation between H19 expression and lymph node metastasis (+ vs.-).

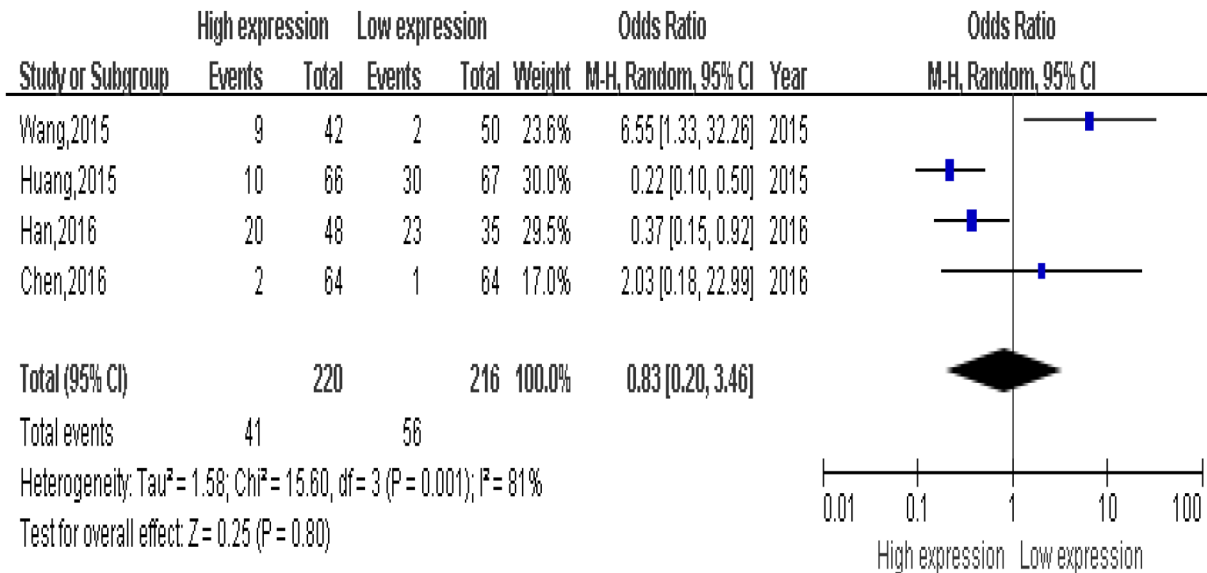

Supplementary Figure S7: The correlation between H19 expression and distant metastasis (+ vs.-).

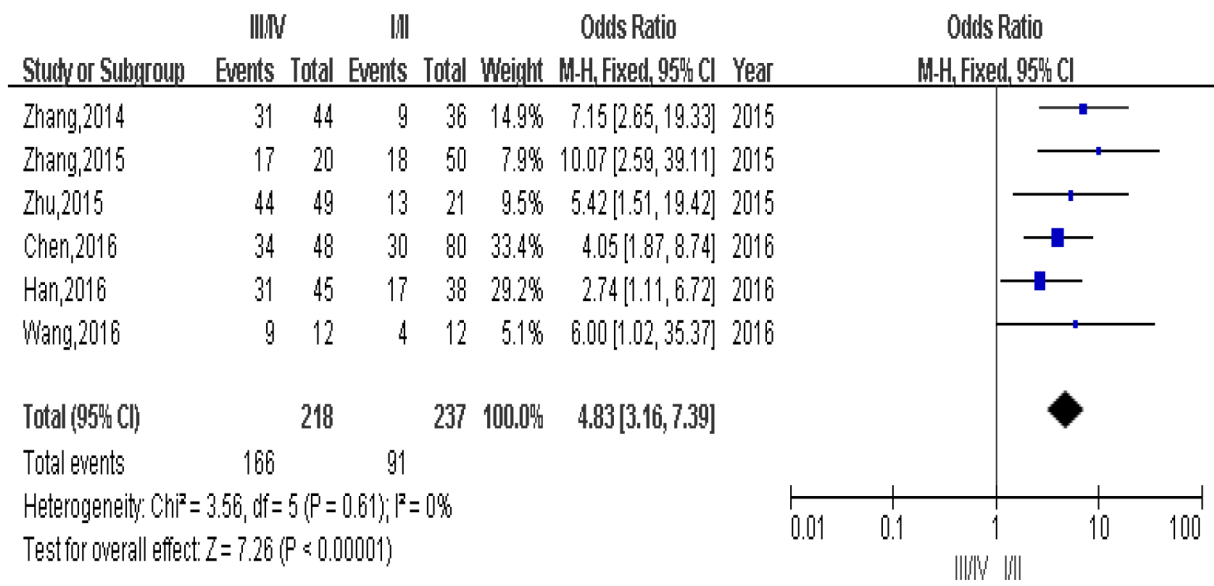

Supplementary Figure S8: The correlation between H19 expression and TNM stage (III-IV vs. I-II).
